# Supplementary material
Source: PubMed Central journal article supplement (PMC4213599)
Supplement: rstb20140058supp1.pdf [file rstb20140058supp1.pdf]

Du, B. *et al.* 2014. Bioaccumulation and trophic dilution of human pharmaceuticals across trophic positions of an effluent-dependent wadeable stream. *Phil. Trans. R. Soc. B.* **369** doi: 10.1098/rstb.2014.0058

## Supplementary material

### Plasma and tissue extractions

Plasma sample extraction followed a slightly modified methodology [1]. An aliquot of fish plasma (up to 1 mL), combined with the same mixture of internal standards that was used for remaining analyses, were diluted to 5 mL using 0.1% (v/v) aqueous formic acid. The mixture was subsequently loaded on pre-conditioned (5 mL of methanol and 5 mL of nano-pure water) HLB SPE cartridges (200mg, Waters Corp, Milford, MA, USA). Each cartridge was air-dried and then eluted with 5 mL of methanol.

Whole issue sample extraction protocol generally followed previously developed methodologies [2, 3]. Whole individual invertebrates were grouped into composites up to 1 g (w/w). Soft tissue was rinsed in DI water and gently dried prior to weighing and composite grouping. In regard to fish and periphyton, samples were treated individually and approximately 1 g of sample was weighed prior to homogenization. All samples were homogenized using a Tissuemiser. A mixture of 23 isotopically-labeled standards (corresponding to deuterated analogs of each target analyte) was added to each sample prior to extraction. Resulting concentrations of labeled standards in each sample were approximately 100 ng/g. Samples were equilibrated by gentle end-over-end inversion for 20 minutes at  $25 \pm 0.1$  °C.

## LC-MS/MS and stable isotope analysis

Analytes were separated on a 15 cm × 2.1 mm (5 μm, 80 Å) Extend-C18 column (Agilent Technologies, Palo Alto, CA) connected with an Extend-C18 guard cartridge 12.5 mm x 2.1 mm (5 μm, 80 Å) (Agilent Technologies, Palo Alto, CA), employing a Varian ProStar Model 212 pump system equipped with a Model 410 autosampler. A binary gradient consisting of 0.1% (v/v) formic acid in water and 100% methanol was employed to achieve chromatographic separation. Eluted analytes were monitored by MS/MS using a Varian model 1200L triple-quadrupole mass analyzer equipped with an electrospray interface (ESI). Calibration curves were constructed by plotting the analyte response factor, which is the ratio of the target analyte signal to the signal of the corresponding isotopically-labeled standard, versus analyte concentration and used to determine analytical concentrations of target analytes. Linear regression with  $1/x^2$  weighting resulted in  $r^2 \geq 0.998$  for all compounds. Each analytical sample batch included one method blank and duplicate matrix spikes. Instrument calibration was monitored by analyzing continuing calibration verification (CCV) samples between every 5 samples with an acceptability criterion of  $\pm 20\%$  [2]. Periphyton and whole biological tissue samples were dried to constant weight (for 24 h at 95 °C in a drying oven) and crushed to a fine powder using a mortar and pestle. These samples were weighted approximately at 1 mg and wrapped in Sn capsules following with the instrumental analysis using a dual-inlet gas-source Stable Isotope Mass Spectrometer and an Elemental Analyzer.

**Table S1.** List of standards of target analytes, corresponding internal standards, and vendors which compounds were purchased from.

|                                  | <b>Standards</b>               | <b>Vendor<sup>a</sup></b> |
|----------------------------------|--------------------------------|---------------------------|
| <i>Analgesic</i>                 | Acetaminophen                  | Cerilliant                |
|                                  | Acetaminophen $d_4$            | Cerilliant                |
|                                  | Codeine                        | Cerilliant                |
|                                  | Codeine $d_3$                  | Cerilliant                |
| <i>Antihypertensive</i>          | Atenolol                       | Cerilliant                |
|                                  | Atenolol $d_7$                 | TRC                       |
|                                  | Propranolol.HCl                | Cerilliant                |
|                                  | Propranolol $d_7$              | TRC                       |
|                                  | Diltiazem.HCl                  | Cerilliant                |
|                                  | Diltiazem $d_3$ .HCl           | TRC                       |
|                                  |                                |                           |
| <i>Stimulant</i>                 | Caffeine                       | Cerilliant                |
|                                  | Caffeine $d_9$                 | TRC                       |
|                                  | Methylphenidate.HCl            | Cerilliant                |
|                                  | Methylphenidate $d_9$ .HCl     | Cerilliant                |
| <i>Anti-seizure</i>              | Carbamazepine                  | Cerilliant                |
|                                  | Carbamazepine $d_{10}$         | Cerilliant                |
| <i>Benzodiazepine</i>            | Diazepam                       | Cerilliant                |
|                                  | Diazepam $d_5$                 | Cerilliant                |
| <i>Antihistamine</i>             | Diphenhydramine.HCl            | Cerilliant                |
|                                  | Diphenhydramine $d_3$          | Cerilliant                |
| <i>Antidepressant</i>            | Fluoxetine.HCl                 | Cerilliant                |
|                                  | Fluoxetine $d_3$ .Oxalate      | Cerilliant                |
|                                  | Paroxetine.Maleate             | Cerilliant                |
|                                  | Paroxetine $d_6$ .Maleate      | Cerilliant                |
|                                  | Sertraline                     | Cerilliant                |
|                                  | Sertraline $d_3$ .HCl          | TRC                       |
|                                  |                                |                           |
| <i>Antidepressant metabolite</i> | Norfluoxetine.Oxalate          | Cerilliant                |
|                                  | Norfluoxetine $d_6$ .Oxalate   | Cerilliant                |
|                                  | Desmethylsertraline.HCl        | TRC                       |
|                                  | Desmethylsertraline $d_4$ .HCl | TRC                       |
|                                  |                                |                           |
| <i>Antilipemic</i>               | Gemfibrozil                    | Sigma-Aldrich             |
|                                  | Gemfibrozil $d_6$              | TRC                       |
| <i>Antibiotic</i>                | Sulfamethoxazole               | Cambridge                 |
|                                  | Sulfamethoxazole $d_4$         | TRC                       |
|                                  | Trimethoprim                   | Cambridge                 |
|                                  | Trimethoprim $d_9$             | TRC                       |
|                                  | Erythromycin                   | Sigma-Aldrich             |
| <i>Anti-inflammatory</i>         | Erythromycin $^{13}\text{C}_3$ | TRC                       |
|                                  | Diclofenac sodium              | Sigma-Aldrich             |
|                                  | Diclofenac $d_4$               | TRC                       |
|                                  | Celecoxib                      | TRC                       |
|                                  | Celecoxib $d_4$                | TRC                       |
| <i>Anticoagulant</i>             | Warfarin                       | Cerilliant                |
|                                  | Warfarin $d_5$                 | TRC                       |
| <i>Artificial sweetener</i>      | Sucralose                      | Sigma-Aldrich             |
|                                  | Sucralose $d_6$                | Santa Cruz                |

a. TRC-Toronto Research Chemicals (Toronto, Ontario, Canada); Cambridge-Cambridge Isotope Laboratories (Andover, MA, USA); Santa Cruz-Santa Cruz Biotechnology (Dallas, Texas, USA)

**Table S2.** Summary of tissue samples from the North Bosque River, Texas, USA.

| Organism (N)                    | Weight (g)<br>(mean±SD) | Length (cm)<br>(mean±SD) | Composite | If composite, no. of<br>organisms used |
|---------------------------------|-------------------------|--------------------------|-----------|----------------------------------------|
| <i>H. azteca</i> (~4000)        | <0.001                  | NA                       | Yes       | ~1000                                  |
| <i>R. elongate</i> (16)         | 0.08±0.01               | NA                       | Yes       | 5                                      |
| <i>Planorbis</i> sp. (68)       | 0.11±0.01               | NA                       | Yes       | 9                                      |
| Small <i>C. fluminea</i> (165)  | 0.07±0.01               | NA                       | Yes       | 17                                     |
| Medium <i>C. fluminea</i> (46)  | 0.21±0.02               | NA                       | Yes       | 5                                      |
| Large <i>C. fluminea</i> (10)   | 1.4±0.26                | NA                       | No        | NA                                     |
| <i>U. imbecilis</i> (2)         | 1.2                     | NA                       | No        | NA                                     |
| <i>U. tetralasmus</i> (1)       | 30                      | NA                       | No        | NA                                     |
| <i>G. affinis</i> (200)         | 0.06±0.01               | NA                       | Yes       | 20                                     |
| Small <i>L. megalotis</i> (10)  | 9.6±3.4                 | 7.7±0.73                 | No        | NA                                     |
| Medium <i>L. megalotis</i> (10) | 25±7.5                  | 10±1.1                   | No        | NA                                     |
| Large <i>L. megalotis</i> (9)   | 68±20                   | 15±1.4                   | No        | NA                                     |
| <i>M. salmoides</i> (2)         | 42                      | 15                       | No        | NA                                     |
| <i>A. natalis</i> (1)           | 110                     | 20                       | No        | NA                                     |
| <i>I. punctatus</i> (1)         | 51                      | 16                       | No        | NA                                     |
| <i>L. yanellus</i> (2)          | 51                      | 16                       | No        | NA                                     |

**Table S3.** Water chemistry data from a 3-day sampling event (June 17-19, 2013) of the North Bosque River, Texas, USA, downstream from the Stephenville, Texas, wastewater treatment plant discharge.

|       | Ammonia <sup>a</sup> | Nitrate/Nitrite | Total Phosphorous | Phosphate | pH   | DO (mg/L) | Specific Conductance (mS/cm) | T (°C) |
|-------|----------------------|-----------------|-------------------|-----------|------|-----------|------------------------------|--------|
| Day 1 | 75.4                 | 6840            | 1110              | 843       | 7.93 | 8.40      | 1.09                         | 30.0   |
| Day 2 | 85.1                 | 6745            | 1140              | 745       | 7.89 | 8.92      | 1.02                         | 26.2   |
| Day 3 | 78.3                 | 6830            | 950               | 581       | 7.87 | 8.18      | 1.06                         | 26.5   |

<sup>a</sup> Nutrient data are expressed in µg/L.

**Table S4.** Method detection limits (MDLs) and occurrence of analytes in water and *Lepomis megalotis* plasma from the North Bosque River, Texas, USA.

| Compounds           | Surface Water (ng/L; mean±SD; n=3) |            |            |            | Fish Plasma (µg/L)<br>(mean±SD; n=15) |           |
|---------------------|------------------------------------|------------|------------|------------|---------------------------------------|-----------|
|                     | MDL                                | Day 1      | Day 2      | Day 3      | MDL                                   | Detected  |
| Acetaminophen       | 2.9                                | ND         | ND         | ND         | 4.7                                   | ND        |
| Codeine             | 8.3                                | ND         | ND         | ND         | 6.9                                   | ND        |
| Atenolol            | 4.3                                | ND         | ND         | ND         | 2.9                                   | ND        |
| Propranolol         | 1.8                                | ND         | ND         | ND         | 0.58                                  | ND        |
| Diltiazem           | 0.24                               | 33±10      | 27±4.3     | 23±11      | 0.12                                  | 0.16±0.14 |
| Caffeine            | 4.5                                | 15±5.5     | 15±1.8     | 11±2.6     | 4.7                                   | ND        |
| Methylphenidate     | 0.30                               | ND         | ND         | ND         | 0.27                                  | ND        |
| Carbamazepine       | 0.53                               | 360±8.3    | 370±4.4    | 370±14     | 0.53                                  | 4.1±3.8   |
| Diazepam            | 4.6                                | ND         | ND         | ND         | 2.8                                   | ND        |
| Diphenhydramine     | 0.22                               | 19±12      | 19±3.0     | 20         | 0.12                                  | 3.0±2.2   |
| Fluoxetine          | 8.4                                | ND         | ND         | ND         | 5.5                                   | ND        |
| Paroxetine          | 11                                 | ND         | ND         | ND         | 1.8                                   | ND        |
| Sertraline          | 6.1                                | ND         | ND         | ND         | 3.7                                   | ND        |
| Norfluoxetine       | 8.5                                | ND         | ND         | ND         | 3.9                                   | ND        |
| Desmethylsertraline | 5.4                                | ND         | ND         | ND         | 8.3                                   | ND        |
| Gemfibrozil         | 2.1                                | 35±11      | 31±4.5     | 31±10      | 6.9                                   | ND        |
| Sulfamethoxazole    | 1.3                                | 98±19      | 92±11      | 87±1.6     | 1.9                                   | ND        |
| Trimethoprim        | 1.3                                | ND         | ND         | ND         | 2.8                                   | ND        |
| Erythromycin        | 8.6                                | ND         | ND         | ND         | 8.6                                   | ND        |
| Diclofenac          | 2.8                                | 79±43      | 71±29      | 86±55      | 0.84                                  | ND        |
| Celecoxib           | 11                                 | 130±49     | 81±10      | 79±27      | 7.9                                   | ND        |
| Warfarin            | 0.78                               | ND         | ND         | ND         | 0.93                                  | ND        |
| Sucralose           | 36                                 | 20000±5500 | 20000±4800 | 16000±1500 | 37                                    | ND        |

**Table S5.** Predicted therapeutic hazard values and fish plasma levels, and observed surface water concentrations and *Lepomis megalotis* plasma concentrations for carbamazepine, diltiazem and diphenhydramine from the North Bosque River, Texas, USA.

| Compound                     | Predicted THV (ng/L) |          |            | Observed Surface Water<br>(ng/L; N =3; ±SE) | Predicted Fish Plasma (µg/L) |          |            | Observed Fish Plasma<br>(µg/L; N=15; ±SD) |
|------------------------------|----------------------|----------|------------|---------------------------------------------|------------------------------|----------|------------|-------------------------------------------|
|                              | $K_{OW}$             | $D_{OW}$ | $D_{lipw}$ |                                             | $K_{OW}$                     | $D_{OW}$ | $D_{lipw}$ |                                           |
| Carbamazepine <sup>1</sup>   | 421897               | 421897   | 148249     | 370±8.6                                     | 1.7                          | 1.7      | 4.9        | 4.1±3.8                                   |
| Diltiazem <sup>1</sup>       | 69                   | 436      | 265        | 28±5.4                                      | 12                           | 1.9      | 3.1        | 0.16±0.14                                 |
| Diphenhydramine <sup>1</sup> | 1952                 | 10547    | 3706       | 19±0.76                                     | 0.5                          | 0.09     | 0.26       | 3.0±2.2                                   |

<sup>1</sup>Human  $C_{max}$  values for carbamazepine, diltiazem and diphenhydramine are 2000, 30 and 50 µg/L, respectively (Schulz, M., Iwersen-Bergmann, S., Andresen, H., Schmoldt, A., 2012. Therapeutic and toxic blood concentrations of nearly 1000 drugs and other xenobiotics. Critical Care 16, R136). pKa of diltiazem and diphenhydramine are 8.94 and 8.98, respectively. THV – therapeutic hazard value.

**Table S6.** Stable isotopes and trophic positions of study organisms and periphyton from the North Bosque River, Texas, USA.

| common Name      | species name                  | n  | $\delta^{13}\text{C}$ | $\delta^{15}\text{N}$ | trophic position |
|------------------|-------------------------------|----|-----------------------|-----------------------|------------------|
| Primary Producer |                               |    |                       |                       |                  |
| Periphyton       |                               | 10 | $-26.30 \pm 2.12$     | $12.34 \pm 0.82$      | $1.55 \pm 0.24$  |
| Invertebrates    |                               |    |                       |                       |                  |
| Asian clam       | <i>Corbicula fluminea</i>     | 29 | $-24.79 \pm 0.16$     | $14.46 \pm 0.50$      |                  |
| small            |                               | 10 | $-24.91 \pm 0.11$     | $13.88 \pm 0.21$      | 2.00             |
| medium           |                               | 9  | $-24.74 \pm 0.15$     | $14.54 \pm 0.14$      | $2.19 \pm 0.04$  |
| large            |                               | 10 | $-24.72 \pm 0.17$     | $14.98 \pm 0.17$      | $2.32 \pm 0.05$  |
| Water scorpion   | <i>Ranatra elongata</i>       | 3  | $-24.63 \pm 0.80$     | $14.47 \pm 1.01$      | $2.17 \pm 0.30$  |
| Snail            | <i>Planorbis</i> sp.          | 8  | $-28.12 \pm 1.13$     | $14.24 \pm 0.89$      | $2.11 \pm 0.26$  |
| Amphipods        | <i>Hyaella azteca</i>         | 4  | $-28.01 \pm 0.01$     | $14.31 \pm 0.08$      | $2.13 \pm 0.02$  |
| Paper pondshell  | <i>Utterbackia imbecilis</i>  | 2  | -24.59                | 15.76                 | 2.55             |
| Pondhorn mussel  | <i>Unio merus tetralasmus</i> | 1  | -26.20                | 14.58                 | 2.21             |
| Vertebrates      |                               |    |                       |                       |                  |
| Largemouth bass  | <i>Micropterus salmoides</i>  | 2  | -23.69                | 19.20                 | 3.56             |
| Mosquito fish    | <i>Gambusia affinis</i>       | 10 | $-25.07 \pm 0.18$     | $16.70 \pm 0.22$      | $2.83 \pm 0.06$  |
| Bullhead catfish | <i>Ameiurus natalis</i>       | 1  | -24.88                | 19.49                 | 3.65             |
| Channel catfish  | <i>Ictalurus punctatus</i>    | 1  | -25.86                | 15.52                 | 2.48             |
| Green sunfish    | <i>Lepomis cyanellus</i>      | 2  | -24.27                | 20.75                 | 4.02             |
| Longear sunfish  | <i>Lepomis megalotis</i>      | 29 | $-24.50 \pm 0.50$     | $20.67 \pm 0.69$      | $4.00 \pm 0.20$  |
| small            |                               | 10 | $-24.65 \pm 0.49$     | $20.79 \pm 0.46$      | $4.03 \pm 0.14$  |
| medium           |                               | 10 | $-24.52 \pm 0.54$     | $20.96 \pm 0.77$      | $4.08 \pm 0.23$  |
| large            |                               | 9  | $-24.30 \pm 0.46$     | $20.21 \pm 0.65$      | $3.86 \pm 0.19$  |



- [1] Fick, J., Lindberg, R.H., Parkkonen, J., Arvidsson, B., Tysklind, M. & Larsson, D.G.J. 2010 Therapeutic Levels of Levonorgestrel Detected in Blood Plasma of Fish: Results from Screening Rainbow Trout Exposed to Treated Sewage Effluents. *Environmental Science & Technology* **44**, 2661-2666.
- [2] Du, B., Perez-Hurtado, P., Brooks, B.W. & Chambliss, C.K. 2012 Evaluation of an isotope dilution liquid chromatography tandem mass spectrometry method for pharmaceuticals in fish. *Journal of Chromatography A* **1253**, 177-183.
- [3] Ramirez, A.J., Mottaleb, M.A., Brooks, B.W. & Chambliss, C.K. 2007 Analysis of pharmaceuticals in fish using liquid chromatography-tandem mass spectrometry. *Analytical Chemistry* **79**, 3155-3163.
